# Supplementary material
Source: MDPI journal article supplement (https://www.mdpi.com/2073-4344/12/10/1214)
Supplement: s1 [file s1]

## Supplementary Materials

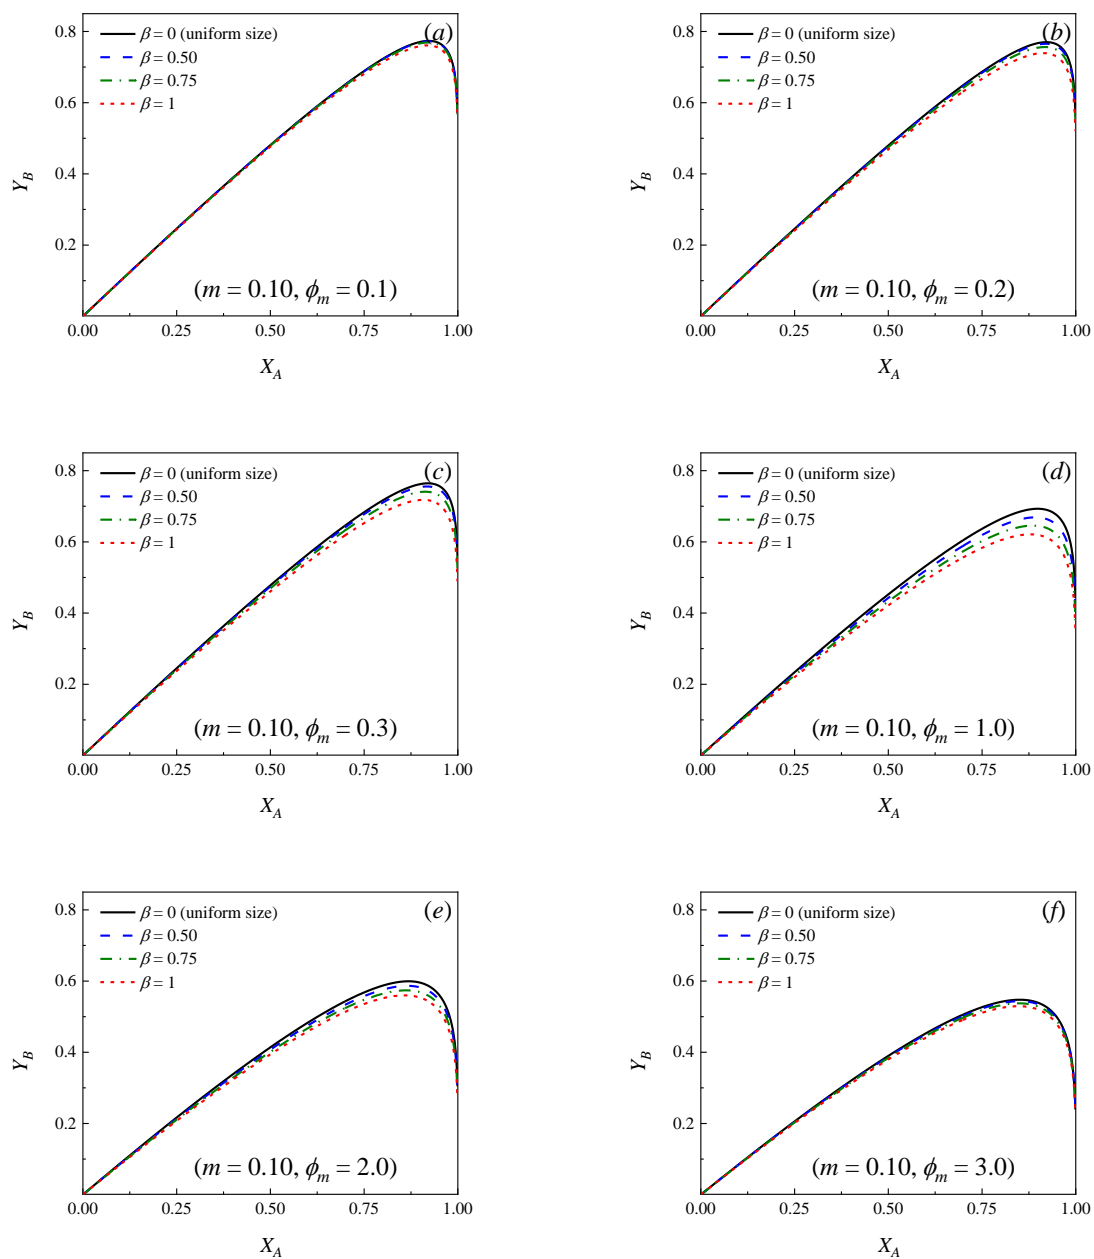

**Figure S1.** Yield of primary product B as a function of the conversion of the reactant A for different values of the dispersion parameter ( $\beta$ ).  $m = k_2/k_1 = 0.10$ .  
 (a)  $\phi_m = 0.1$ ; (b)  $\phi_m = 0.2$ ; (c)  $\phi_m = 0.3$ ; (d)  $\phi_m = 1.0$ ; (e)  $\phi_m = 2.0$ ; (f)  $\phi_m = 3.0$ .

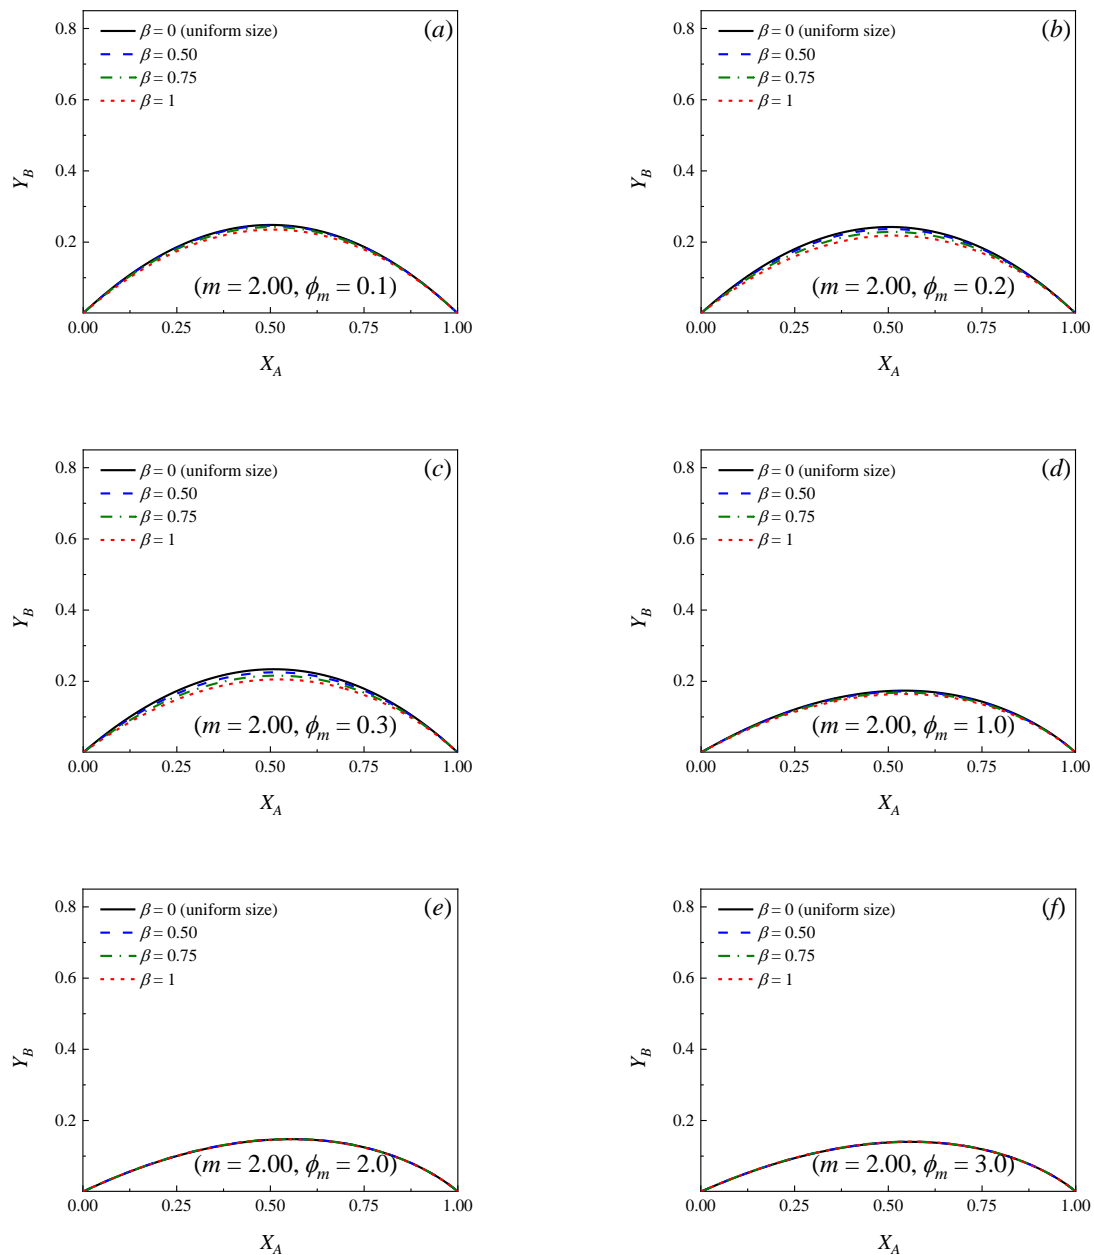

**Figure S2.** Yield of primary product  $B$  as a function of the conversion of the reactant  $A$  for different values of the dispersion parameter ( $\beta$ ).  $m = k_2/k_1 = 2.00$ .  
 (a)  $\phi_m = 0.1$ ; (b)  $\phi_m = 0.2$ ; (c)  $\phi_m = 0.3$ ; (d)  $\phi_m = 1.0$ ; (e)  $\phi_m = 2.0$ ; (f)  $\phi_m = 3.0$ .
